# Supplementary material
Source: HighWire-hosted journal article supplement (https://erj.ersjournals.com/content/55/6/2001030)
Supplement: inline-supplementary-material-1 [file inline-supplementary-material-1.pdf]

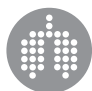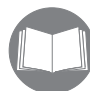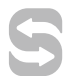

SHAREABLE PDF

# Expanding the spectrum of European Respiratory Society official scientific documents: short documents complement clinical practice guidelines, statements and technical standards

Nicolas Roche<sup>1</sup>, Thomy Tonia<sup>2</sup>, Marc Miravittles <sup>3</sup>, Valérie Vaccaro<sup>4</sup>, Céline Genton<sup>4</sup>, Tobias Welte <sup>5</sup>, Thierry Troosters<sup>6</sup>, Guy Brusselle <sup>7,8</sup> and Chris Brightling<sup>9</sup>

**Affiliations:** <sup>1</sup>Respiratory Medicine, Hôpital Cochin, AP-HP.Centre - Université de Paris, UMR 1016, Institut Cochin, Paris, France. <sup>2</sup>Institute of Social and Preventive Medicine, University of Bern, Bern, Switzerland. <sup>3</sup>Pneumology Dept, Hospital Universitari Vall d'Hebron/Vall d'Hebron Institut de Recerca (VHIR); Ciber de Enfermedades Respiratorias (CIBERES), Barcelona, Spain. <sup>4</sup>European Respiratory Society, Lausanne, Switzerland. <sup>5</sup>University of Hannover, School of Medicine, Hannover, Germany. <sup>6</sup>Dept of Rehabilitation Sciences, KU Leuven, Leuven, Belgium. <sup>7</sup>Dept of Respiratory Medicine, Ghent University Hospital, Ghent, Belgium. <sup>8</sup>Depts of Epidemiology and Respiratory Medicine, Erasmus Medical Center Rotterdam, Rotterdam, The Netherlands. <sup>9</sup>Institute for Lung Health, NIHR Leicester Biomedical Research Centre, Dept of Respiratory Sciences, University of Leicester, Leicester, UK.

**Correspondence:** Nicolas Roche, Service de Pneumologie, Hôpital Cochin, 27 rue du Fbg St Jacques, 75014 Paris, France. E-mail: nicolas.roche@aphp.fr

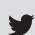

@ERSpublications

The European Respiratory Society now issues short official scientific documents <https://bit.ly/3brN9jO>

**Cite this article as:** Roche N, Tonia T, Miravittles M, *et al.* Expanding the spectrum of European Respiratory Society official scientific documents: short documents complement clinical practice guidelines, statements and technical standards. *Eur Respir J* 2020; 55: 2001030 [<https://doi.org/10.1183/13993003.01030-2020>].

This single-page version can be shared freely online.

In this issue of the *European Respiratory Journal (ERJ)*, the European Respiratory Society (ERS) releases its first “short guideline” document, dealing with inhaled corticosteroid (ICS) withdrawal in COPD [1]. This guideline belongs to a new type of “short guidance” documents developed and published by the ERS; the main goal and characteristic is the shortened timeframe between project initiation and final output, thanks to a more restricted focus. Most importantly, these documents are not short versions of original guidelines and statements: they result from an original process.
